# Supplementary material for: Solar radiation estimation in West Africa: impact of dust conditions during 2021 dry season
Source: Copernicus journal article supplement (doi:10.5194/egusphere-2024-1604), 2024-06-10
Supplement: Supplementary file 1 [file egusphere-2024-1604-supplement.pdf]

1 **Solar radiation estimation in West Africa: impact of dust conditions during**  
2 **2021 dry season**

3

4 **Supplementary materials**

5 Several metrics are used to assess the quality of the simulations such as the Mean Absolute  
6 Error (*MAE*, eq.2), the normalised Mean Absolute Error (*nMAE*, eq.3), the Mean Bias Error  
7 (*MBE*, eq.4) the Pearson correlation coefficient (*corrcoef*, eq.5) and the Index of Agreement  
8 (*IOA*, eq.6, Legates and McCabe, 2013) :

$$MAE = \frac{1}{N} \sum_{i=1}^N |f_i - o_i| \quad (1)$$

$$nMAE = \frac{100 * MAE}{\max(o_i)} \quad (2)$$

$$MBE = \frac{1}{N} \sum_{i=1}^N (f_i - o_i) \quad (3)$$

$$corrcoef = \frac{\sum_{i=1}^N (o_i - \bar{o})(f_i - \bar{f})}{\sqrt{\sum_{i=1}^N (o_i - \bar{o})^2} \sqrt{\sum_{i=1}^N (f_i - \bar{f})^2}} \quad (4)$$

$$IOA = 1 - \frac{\sum_{i=1}^N |f_i - o_i|}{\sum_{i=1}^N (|f_i - \bar{o}| + |o_i - \bar{o}|)} \quad (5)$$

9 where *o* refers to the observations and *f* to the forecasts. The *MAE* gives equal weight to all  
10 errors and is less sensitive to outliers. *nMAE* enables the comparison of errors in data with  
11 varying amplitudes. *MBE* is used to estimate the average bias of the simulations. Lower  
12 values of *MAE*, *nMAE* and *MBE* indicate a better model accuracy. The Pearson correlation  
13 coefficient *corrcoef* measures the linear correlation between two variables. A higher  
14 absolute value of *corrcoef* suggests a stronger linear correlation. The *IOA* is a standardised  
15 measure that detects additive and proportional differences in the observed and simulated  
16 means and variances, providing a measure of the degree of model errors. An agreement  
17 value of 1 indicates a perfect match, while 0 indicates no agreement at all.

18

19

20

21

22

23

24

25

26

27

28 **Table S1** - Dust refraction indices (real and imaginary part) for the computation of dust  
 29 radiative properties.

| $\lambda$ (nm) | $\Re(n)$ | $\Im(n)$             |
|----------------|----------|----------------------|
| 200            | 1.53     | $5.5 \times 10^{-3}$ |
| 300            | 1.53     | $5.5 \times 10^{-3}$ |
| 400            | 1.53     | $2.4 \times 10^{-3}$ |
| 600            | 1.53     | $8.9 \times 10^{-4}$ |
| 999            | 1.53     | $7.6 \times 10^{-4}$ |

30  
 31 **Table S2** - Dust aerosol radiative properties for the 10 CHIMERE aerosol size bins (Mie  
 32 theory calculation).  $r_{eff}$  is the effective radius (in  $\mu\text{m}$ ),  $Q$  is the extinction coefficient,  $SSA$  is  
 33 the single-scattering albedo and  $\omega_{1 \leq i \leq 7}$  are the first 7 terms of the Taylor expansion of the  
 34 scattering phase function.

| $\lambda$ (nm) | $r_{eff}$ | $Q$    | $SSA$  | $\omega_1$ | $\omega_2$ | $\omega_3$ | $\omega_4$ | $\omega_5$ | $\omega_6$ | $\omega_7$ |
|----------------|-----------|--------|--------|------------|------------|------------|------------|------------|------------|------------|
| <b>Dust 1</b>  |           |        |        |            |            |            |            |            |            |            |
| 200            | 0.098     | 3.7320 | 0.9763 | 2.194      | 2.688      | 2.482      | 1.887      | 1.217      | 0.611      | 0.181      |
| 300            | 0.098     | 2.1717 | 0.9751 | 1.947      | 1.789      | 1.067      | 0.482      | 0.123      | 0.024      | 0.004      |
| 400            | 0.098     | 1.1436 | 0.9858 | 1.708      | 1.146      | 0.393      | 0.106      | 0.018      | 0.002      | 0.000      |
| 600            | 0.098     | 0.3239 | 0.9911 | 0.823      | 0.627      | 0.148      | 0.018      | 0.001      | 0.000      | 0.000      |
| 999            | 0.098     | 0.0501 | 0.9764 | 0.283      | 0.515      | 0.052      | 0.002      | 0.000      | 0.000      | 0.000      |
| <b>Dust 2</b>  |           |        |        |            |            |            |            |            |            |            |
| 200            | 0.149     | 3.7097 | 0.9632 | 2.104      | 2.860      | 2.897      | 3.010      | 2.862      | 2.552      | 2.146      |
| 300            | 0.149     | 3.8024 | 0.9767 | 2.195      | 2.692      | 2.454      | 1.814      | 1.112      | 0.532      | 0.129      |
| 400            | 0.149     | 2.6412 | 0.9896 | 2.019      | 2.042      | 1.405      | 0.688      | 0.187      | 0.043      | 0.007      |
| 600            | 0.149     | 1.0626 | 0.9945 | 1.692      | 1.080      | 0.353      | 0.086      | 0.013      | 0.001      | 0.000      |
| 999            | 0.149     | 0.2111 | 0.9902 | 0.590      | 0.564      | 0.106      | 0.010      | 0.001      | 0.000      | 0.000      |
| <b>Dust 3</b>  |           |        |        |            |            |            |            |            |            |            |
| 200            | 0.210     | 2.1345 | 0.9092 | 1.596      | 2.133      | 1.578      | 1.994      | 1.824      | 2.131      | 2.247      |
| 300            | 0.210     | 3.9009 | 0.9666 | 2.148      | 2.899      | 2.956      | 2.969      | 2.727      | 2.267      | 1.743      |
| 400            | 0.210     | 3.9485 | 0.9895 | 2.199      | 2.757      | 2.609      | 2.066      | 1.394      | 0.712      | 0.210      |
| 600            | 0.210     | 2.3853 | 0.9960 | 1.955      | 1.864      | 1.152      | 0.532      | 0.136      | 0.027      | 0.004      |
| 999            | 0.210     | 0.6475 | 0.9944 | 1.300      | 0.814      | 0.240      | 0.044      | 0.005      | 0.000      | 0.000      |
| <b>Dust 4</b>  |           |        |        |            |            |            |            |            |            |            |
| 200            | 0.319     | 2.5556 | 0.8925 | 2.270      | 3.369      | 3.761      | 4.635      | 4.785      | 5.321      | 5.282      |
| 300            | 0.319     | 2.1960 | 0.9092 | 1.668      | 2.279      | 1.838      | 2.320      | 2.171      | 2.501      | 2.523      |

|                |       |        |        |       |       |       |       |       |        |        |
|----------------|-------|--------|--------|-------|-------|-------|-------|-------|--------|--------|
| 400            | 0.319 | 3.2922 | 0.9795 | 1.979 | 2.684 | 2.583 | 2.754 | 2.637 | 2.494  | 2.285  |
| 600            | 0.319 | 3.9629 | 0.9959 | 2.186 | 2.767 | 2.630 | 2.156 | 1.529 | 0.878  | 0.368  |
| 999            | 0.319 | 2.0516 | 0.9965 | 1.902 | 1.677 | 0.915 | 0.394 | 0.096 | 0.0018 | 0.002  |
| <b>Dust 5</b>  |       |        |        |       |       |       |       |       |        |        |
| 200            | 0.493 | 2.3054 | 0.8513 | 2.348 | 3.416 | 3.827 | 4.710 | 5.112 | 5.940  | 6.348  |
| 300            | 0.493 | 2.5953 | 0.8929 | 2.308 | 3.427 | 3.866 | 4.744 | 4.917 | 5.454  | 5.440  |
| 400            | 0.493 | 2.1819 | 0.9516 | 1.772 | 2.579 | 2.321 | 3.101 | 2.976 | 3.461  | 3.335  |
| 600            | 0.493 | 3.2132 | 0.9919 | 1.942 | 2.640 | 2.511 | 2.720 | 2.639 | 2.565  | 2.416  |
| 999            | 0.493 | 3.8226 | 0.9967 | 2.185 | 2.680 | 2.455 | 1.835 | 1.148 | 0.559  | 0.141  |
| <b>Dust 6</b>  |       |        |        |       |       |       |       |       |        |        |
| 200            | 0.740 | 2.2360 | 0.8042 | 2.468 | 3.652 | 4.293 | 5.309 | 5.916 | 6.898  | 7.500  |
| 300            | 0.740 | 2.3054 | 0.8513 | 2.348 | 3.416 | 3.827 | 4.710 | 5.112 | 5.940  | 6.348  |
| 400            | 0.740 | 2.3952 | 0.9387 | 2.246 | 3.260 | 3.478 | 4.195 | 4.192 | 4.693  | 4.664  |
| 600            | 0.740 | 2.1753 | 0.9814 | 1.743 | 2.548 | 2.247 | 3.033 | 2.875 | 3.368  | 3.226  |
| 999            | 0.740 | 3.6805 | 0.9946 | 2.059 | 2.801 | 2.789 | 2.883 | 2.713 | 2.402  | 2.034  |
| <b>Dust 7</b>  |       |        |        |       |       |       |       |       |        |        |
| 200            | 1.110 | 2.1857 | 0.7495 | 2.569 | 3.858 | 4.727 | 5.865 | 6.735 | 7.882  | 8.748  |
| 300            | 1.110 | 2.2360 | 0.8042 | 2.468 | 3.652 | 4.293 | 5.309 | 5.916 | 6.898  | 7.500  |
| 400            | 1.110 | 2.2944 | 0.9186 | 2.297 | 3.379 | 3.695 | 4.645 | 4.948 | 5.820  | 6.124  |
| 600            | 1.110 | 2.3941 | 0.9752 | 2.207 | 3.211 | 3.365 | 4.083 | 4.025 | 4.531  | 4.466  |
| 999            | 1.110 | 2.0755 | 0.9851 | 1.562 | 2.172 | 1.571 | 2.123 | 1.865 | 2.256  | 2.223  |
| <b>Dust 8</b>  |       |        |        |       |       |       |       |       |        |        |
| 200            | 1.654 | 2.1364 | 0.6889 | 2.657 | 4.059 | 5.165 | 6.427 | 7.555 | 8.848  | 9.972  |
| 300            | 1.654 | 2.1891 | 0.7509 | 2.568 | 3.856 | 4.722 | 5.859 | 6.726 | 7.871  | 8.735  |
| 400            | 1.654 | 2.2338 | 0.8903 | 2.401 | 3.552 | 4.017 | 5.023 | 5.482 | 6.490  | 6.998  |
| 600            | 1.654 | 2.2906 | 0.9666 | 2.247 | 3.311 | 3.526 | 4.468 | 4.678 | 5.547  | 5.782  |
| 999            | 1.654 | 2.6197 | 0.9823 | 2.219 | 3.316 | 3.603 | 4.482 | 4.524 | 5.079  | 4.986  |
| <b>Dust 9</b>  |       |        |        |       |       |       |       |       |        |        |
| 200            | 2.466 | 2.1087 | 0.6323 | 2.736 | 4.273 | 5.630 | 7.055 | 8.436 | 9.888  | 11.257 |
| 300            | 2.466 | 2.1359 | 0.6895 | 2.656 | 4.056 | 5.158 | 6.419 | 7.542 | 8.834  | 9.953  |
| 400            | 2.466 | 2.1796 | 0.8520 | 2.480 | 3.693 | 4.303 | 5.373 | 6.006 | 7.126  | 7.815  |
| 600            | 2.466 | 2.2386 | 0.9541 | 2.338 | 3.463 | 3.792 | 4.789 | 5.113 | 6.112  | 6.505  |
| 999            | 2.466 | 2.3090 | 0.9723 | 2.222 | 3.248 | 3.416 | 4.291 | 4.467 | 5.291  | 5.539  |
| <b>Dust 10</b> |       |        |        |       |       |       |       |       |        |        |
| 200            | 3.915 | 2.0781 | 0.5812 | 2.801 | 4.490 | 6.092 | 7.706 | 9.317 | 10.939 | 12.530 |
| 300            | 3.915 | 2.1031 | 0.6236 | 2.746 | 4.306 | 5.701 | 7.154 | 8.571 | 10.049 | 11.452 |

|     |       |        |        |       |       |       |        |       |       |       |
|-----|-------|--------|--------|-------|-------|-------|--------|-------|-------|-------|
| 400 | 3.915 | 2.1224 | 0.7926 | 2.565 | 3.854 | 4.658 | 5.801  | 6.653 | 7.879 | 8.785 |
| 600 | 3.915 | 2.1676 | 0.9321 | 2.410 | 3.585 | 4.010 | 5.053  | 5.504 | 6.612 | 7.155 |
| 999 | 3.915 | 2.2181 | 0.9614 | 2.319 | 3.430 | 3.722 | 4.7000 | 4.977 | 5.945 | 6.289 |

---

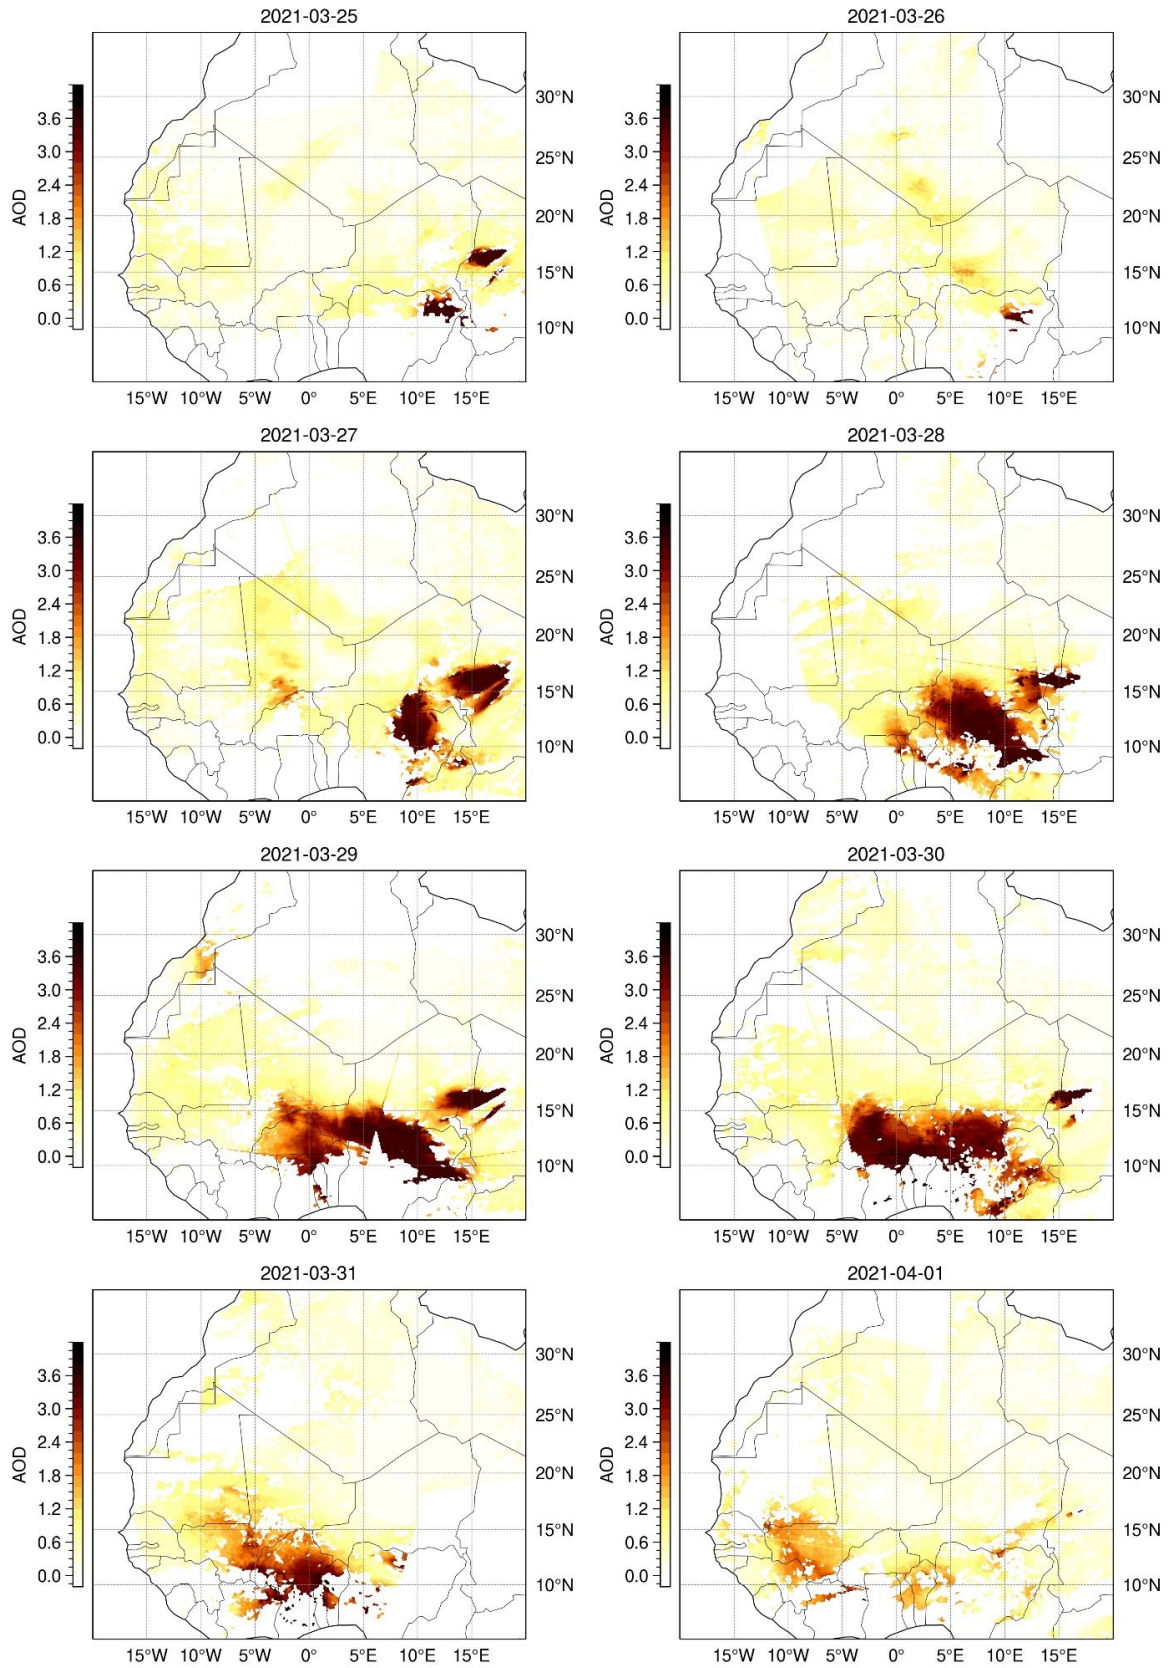

36  
37  
38

**Figure S1** - Daily mean Aerosol Optical Depth at 550nm from MODIS satellite observations from 25 March to 01 April 2021.

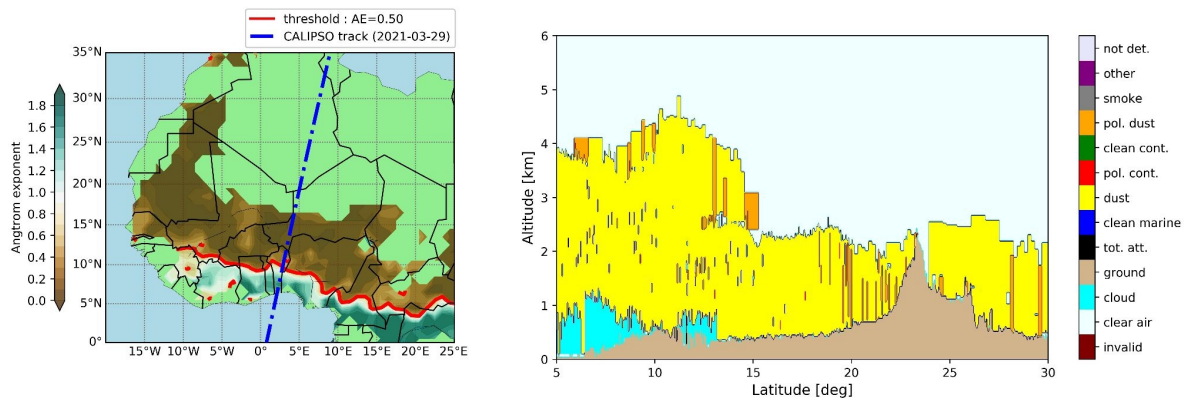

39  
 40 **Figure S2** - The left panel displays the MODIS level 3 Ångström Exponent averaged over  
 41 the case study period (28 March to 01 April 2021) for MODIS AOD values greater than 0.5.  
 42 The blue dashed lines represent the CALIPSO satellite track on 29 March 2021. The right  
 43 panel shows the CALIOP Vertical Feature Mask (VFM) from the CALIPSO satellite overpass  
 44 on 29 March 2021.  
 45

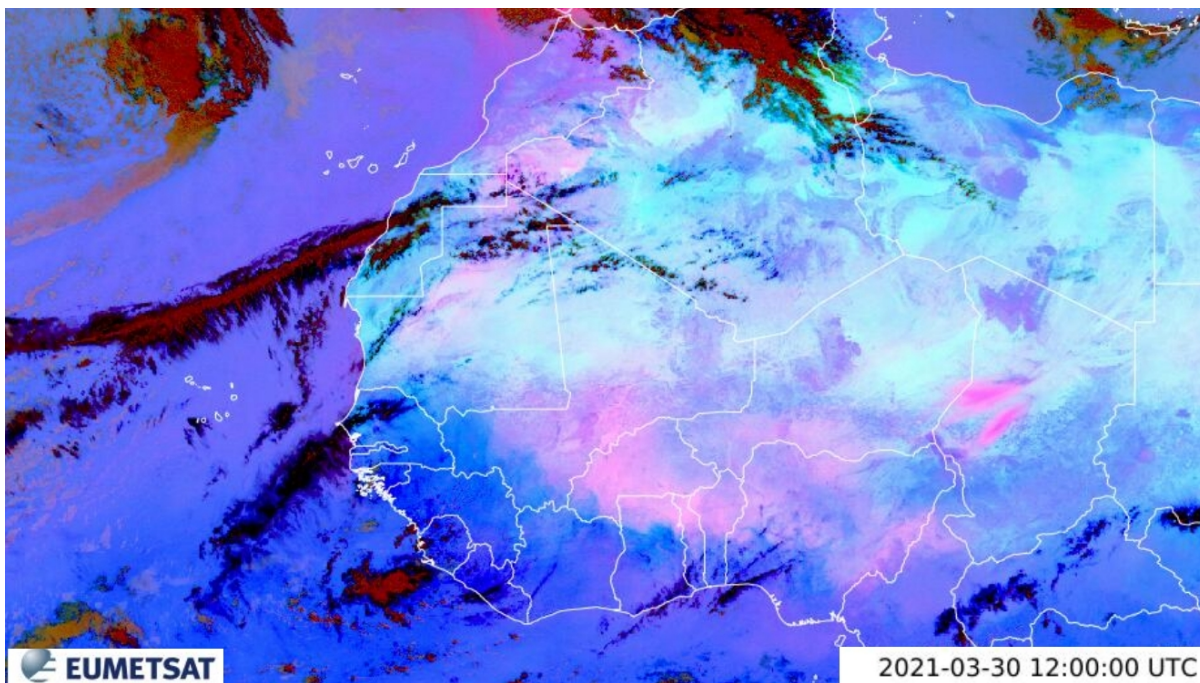

46  
 47 **Figure S3** - MSG Dust RGB composite on 30 March 2021 at 12h. Pink areas correspond to  
 48 dust plumes, black areas are cirrus clouds with no clouds below, red refers to thick, high and  
 49 cold ice clouds.  
 50



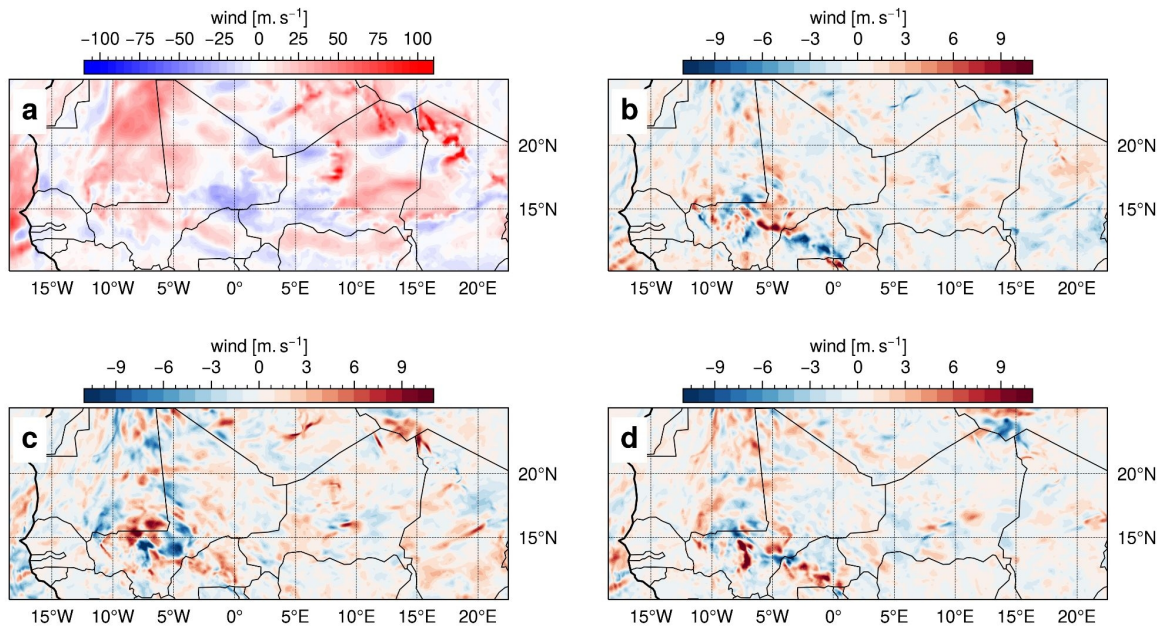

51  
 52 **Figure S4** - Squared surface wind speed on March 28th at 10h with a) the difference  
 53 between the three WRF-CHIMERE simulation average and ERA5 reanalysis. For panels b, c  
 54 and d, squared surface wind speed on March 28th at 10h differences between each of the  
 55 WRF-CHIMERE simulations driven by GOCART, MERRA2 and CAMS, respectively, and the  
 56 mean of the three WRF-CHIMERE simulations. The time used for the figure was selected  
 57 since it corresponds to the maximum of dust emission flux during case study. The surface  
 58 wind speed is squared, given that dust emissions are determined by wind velocities with a  
 59 squared velocity.  
 60
